# Supplementary material for: Visualization and deconvolution of carrier kinetics within grains of Cu2ZnSnS4−xSex using ultrafast diffuse reflectance microscopy
Source: Royal Society of Chemistry journal article supplement (doi:10.1039/d4tc01512f), 2024-01-01
Supplement: d4tc01512f1.pdf [file d4tc01512f1.pdf]

**Supporting Information**

**Visualization and deconvolution of carrier kinetics within grains of  $\text{Cu}_2\text{ZnSnS}_{4-x}\text{Se}_x$  using ultrafast diffuse reflectance microscopy**

Maha Sharif<sup>1,2</sup>, Xiao Ma<sup>1,2</sup>, Elham Ghadiri<sup>1,2</sup>

<sup>1</sup>Department of Chemistry, and <sup>2</sup>Center for Functional Materials, Wake Forest University, Winston-Salem 27109, North Carolina, United States

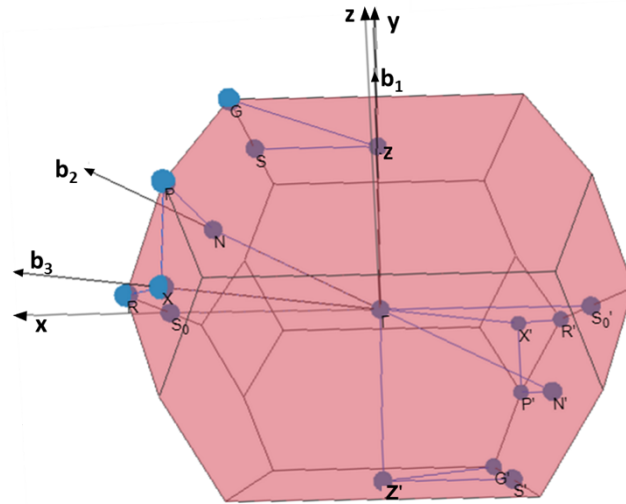

**Fig. S1.** Enlarged Brillouin zone for Kesterite CZTS generated by Seek-path<sup>1</sup>.

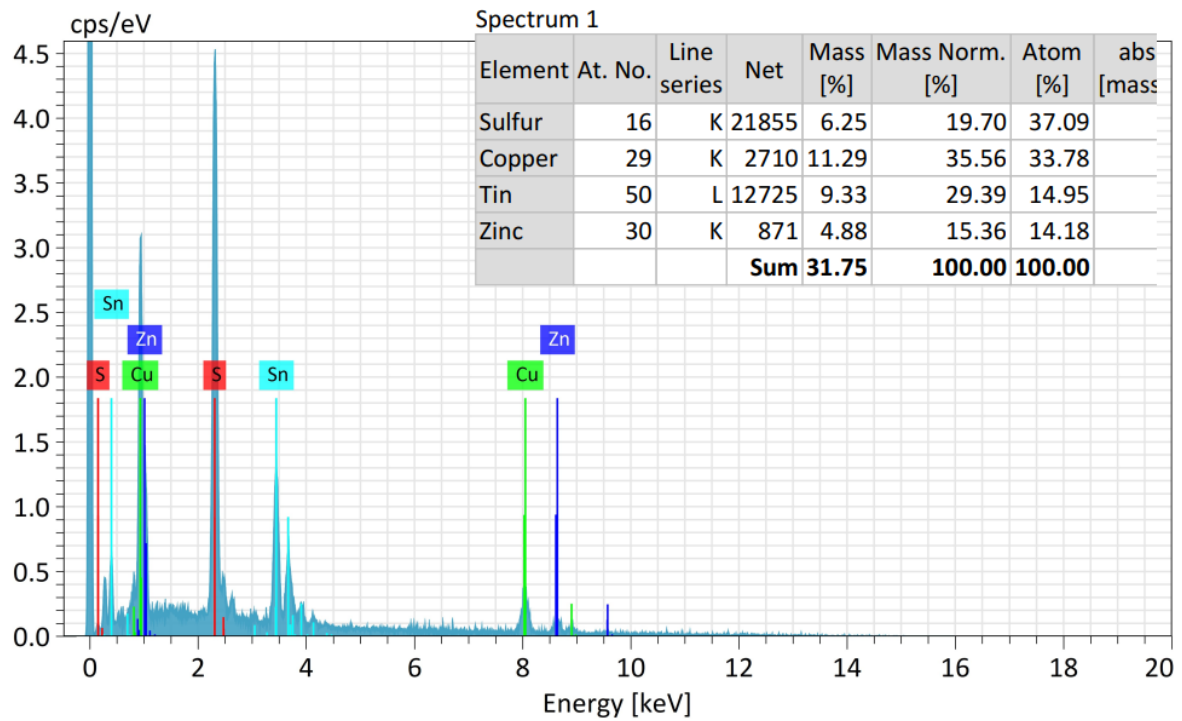

**Fig. S2.** Energy dispersive spectrum (EDS) for  $\text{Cu}_2\text{ZnSnS}_4$ .

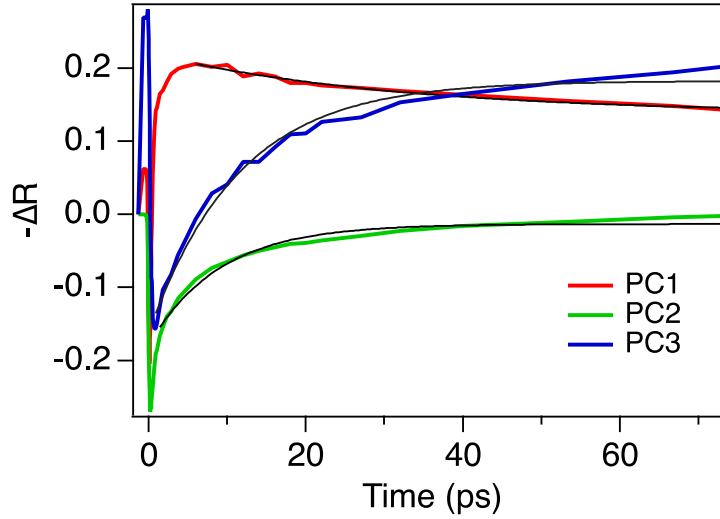

**Fig. S3.** Representative principal components of the TAS extracted from TAM images. PCs are fitted with single exponential functions and the fitting parameters are provided in the supporting table 1.

**Supporting Table S1.** Parameters of exponential function fit to TAS PC components extracted from TAM images shown in Fig. 3 and S.

|            | <b>Y0</b>        | <b>A1</b>        | <b><math>\tau_1</math> (ps)</b> |
|------------|------------------|------------------|---------------------------------|
| <b>PC1</b> | $0.14 \pm 0.00$  | $0.08 \pm 0.00$  | $31.25 \pm 4.71$                |
| <b>PC2</b> | $-0.01 \pm 0.00$ | $-0.17 \pm 0.00$ | $8.25 \pm 0.68$                 |
| <b>PC3</b> | $0.18 \pm 0.01$  | $-0.34 \pm 0.01$ | $11.37 \pm 0.62$                |

### Calculation of laser fluence, and carrier density

The absorption coefficient  $\alpha$  of CZTS was estimated using equation S1, as suggested by Bindu *et al.*<sup>2</sup>:

$$\alpha = \frac{\ln \frac{100}{T\% + R\%}}{d} \quad (S1)$$

According to Fig. 1c at 460 nm, the Transmittance% (T%) of the sample is 1.1 % and the Reflectance% (R%) is 28.3 %. The thickness  $d$  of the CZTS film for which the optical absorption responses are provided in Fig. 1c, was measured by the cross section under SEM.

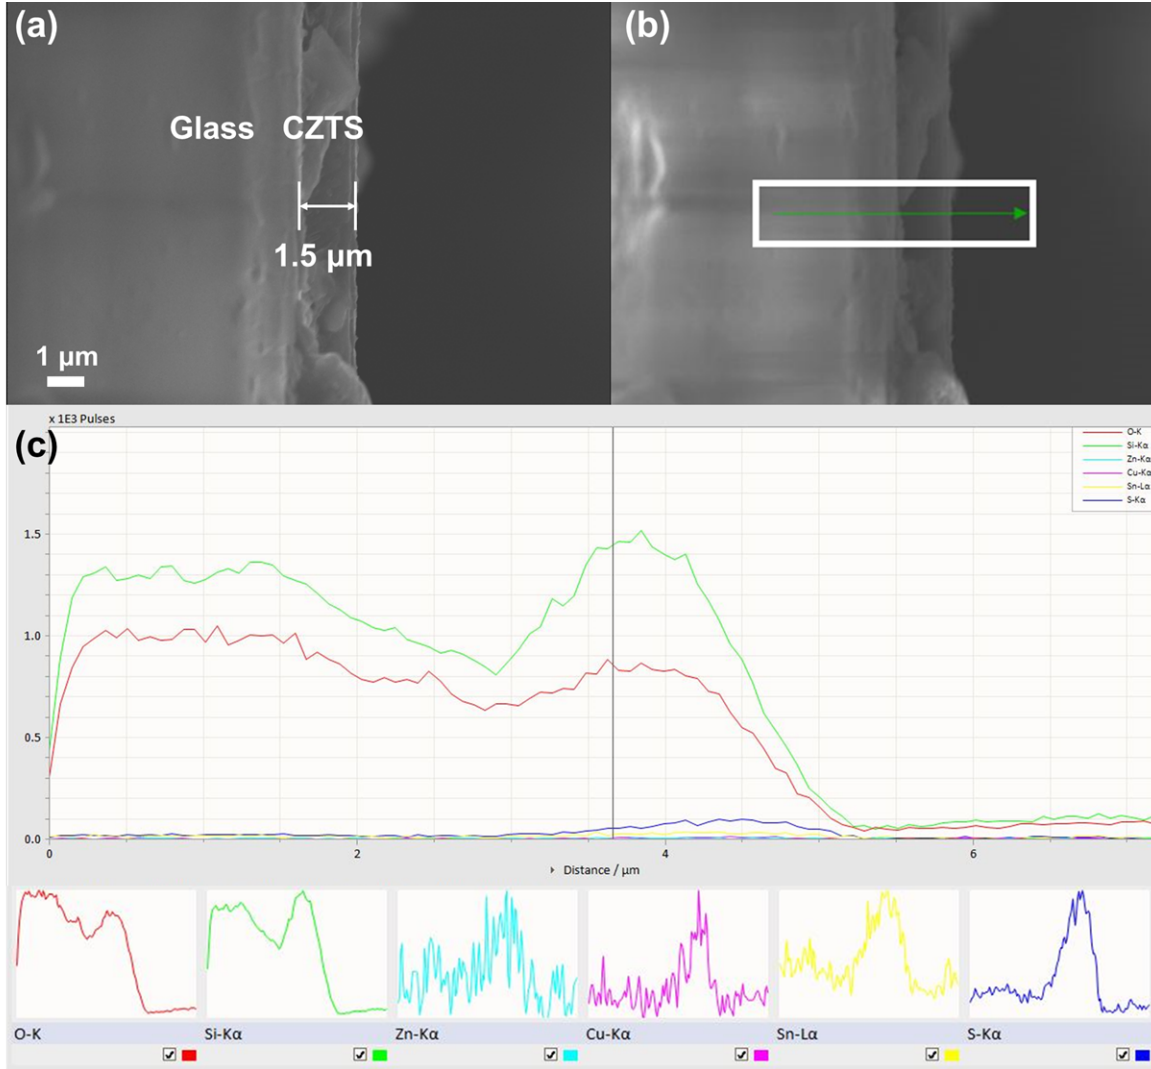

**Fig. S4.** (a) The cross-section scanning electron microscopy (SEM) image of CZTS film, (b) EDS in line scan mode and (c) corresponding elemental distribution results across the green arrow shown in Fig. S4b.

Therefore, the absorption coefficient  $\alpha = 8.1 \times 10^3 \text{ cm}^{-1}$  for the CZTS sample at 460 nm.

With a pump power of 1 mW and a beam diameter of  $5 \mu\text{m}$ , the pump fluence was typically  $50 \text{ mJ cm}^{-2}$ . With an absorption coefficient of  $8.1 \times 10^3 \text{ cm}^{-1}$  (calculation shown above) and assuming a photon-to-carrier yield of 100% for the CZTS sample, the initial carrier density was estimated  $9.4 \times 10^{20} \text{ cm}^{-3}$  according to equation S2 according to previous reports<sup>3</sup>:

$$\text{density} = \frac{F \alpha}{h\nu} \quad (S2)$$

Where  $F$  and  $\alpha$  represent the fluence and absorption coefficient respectively, and  $h\nu$  is photon energy.

For 600 nm-pump, T% become 5.61% and R% is 27.36%,  $\alpha$  become  $1.11/d = 7.4 \times 10^3 \text{cm}^{-1}$  and the initial carrier density would become  $11.2 \times 10^{20} \text{cm}^{-3}$ , which is 18.6 % larger than the value for 460 nm-pump.

- (1) Hinuma, Y.; Pizzi, G.; Kumagai, Y.; Oba, F.; Tanaka, I. Band Structure Diagram Paths Based on Crystallography. *Comput. Mater. Sci.* **2017**, *128*, 140–184.  
<https://doi.org/10.1016/j.commatsci.2016.10.015>.
- (2) Bindu, K.; Nair, P. K. Semiconducting Tin Selenide Thin Films Prepared by Heating Se–Sn Layers. *Semicond. Sci. Technol.* **2004**, *19* (12), 1348–1353.  
<https://doi.org/10.1088/0268-1242/19/12/003>.
- (3) Lv, J.; Liu, A.; Shi, D.; Li, M.; Liu, X.; Wan, Y. Hot Carrier Trapping and It's Influence to the Carrier Diffusion in CsPbBr<sub>3</sub> Perovskite Film Revealed by Transient Absorption Microscopy. *Adv. Sci.* **2024**, 2403507.  
<https://doi.org/10.1002/advs.202403507>.
